# Supplementary material for: Hydrogen-treated hematite nanostructures with low onset potential for highly efficient solar water oxidation
Source: Royal Society of Chemistry journal article supplement (doi:10.1039/c4ta00729h), 2014-01-01
Supplement: c4ta00729h1.pdf [file c4ta00729h1.pdf]

## Supporting information

### **Hydrogen-Treated Hematite Nanostructures with Low Onset Potential for Highly Efficient Solar Water Oxidation**

*Ming Li, Jiujun Deng, Aiwu Pu, Pingping Zhang, Hui Zhang, Jing Gao, Yuanyuan*

*Hao, Jun Zhong\* and Xuhui Sun\**

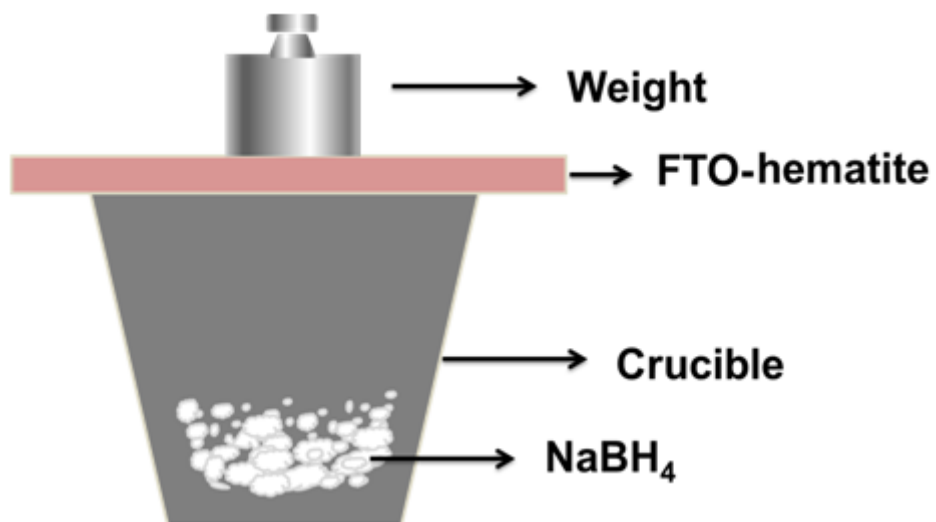

**Figure S1:** Illustration of the experimental setup for H<sub>2</sub> treatment.

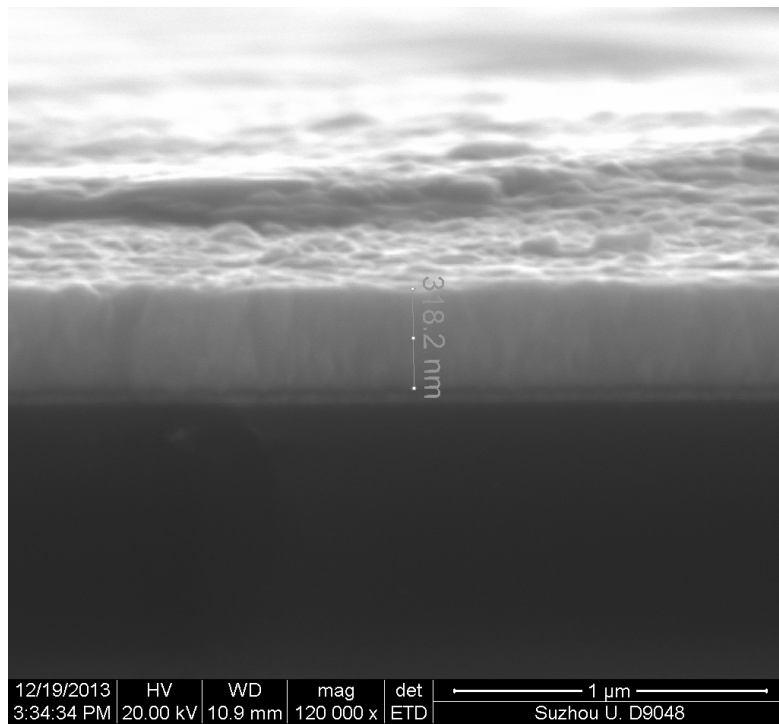

**Figure S2:** SEM image of the cross section of H<sub>2</sub>-treated (8 mmol NaBH<sub>4</sub>) hematite nanostructures.

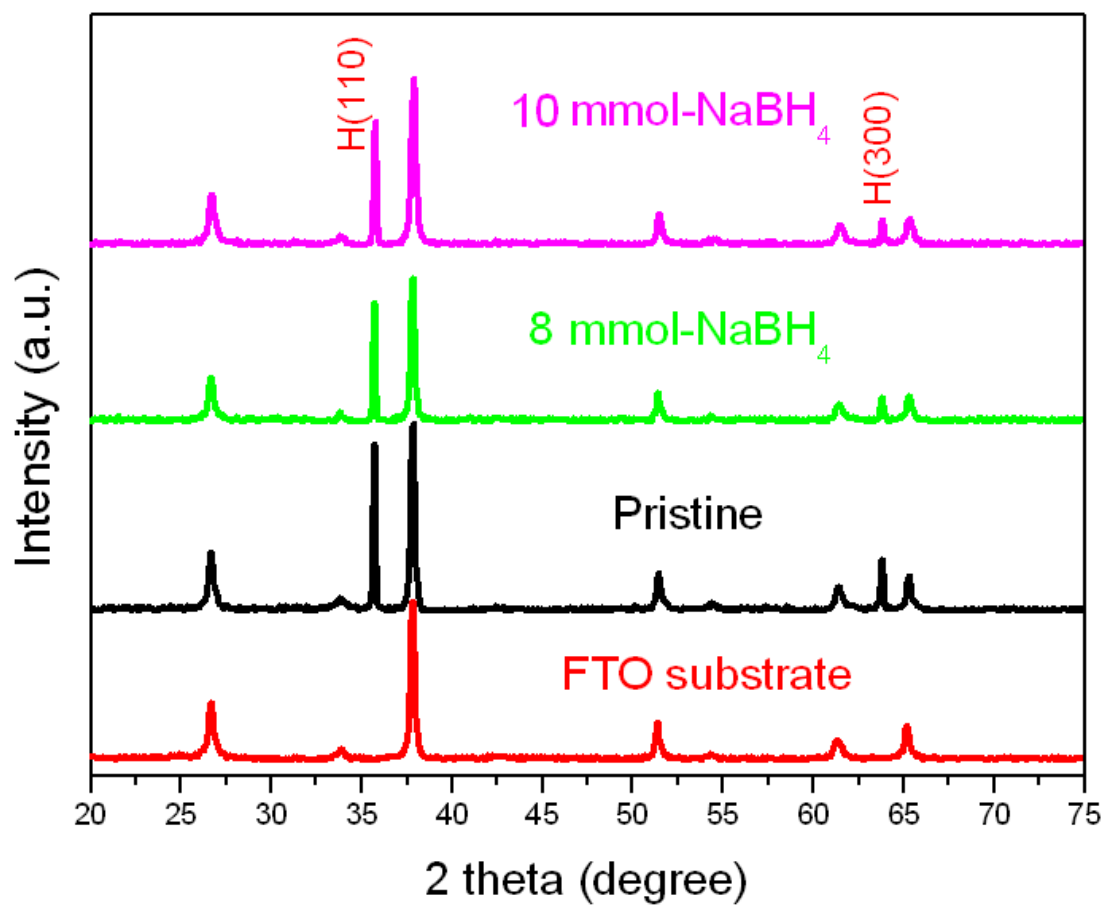

**Figure S3:** XRD spectra of hematite nanostructures before and after H<sub>2</sub> treatment.

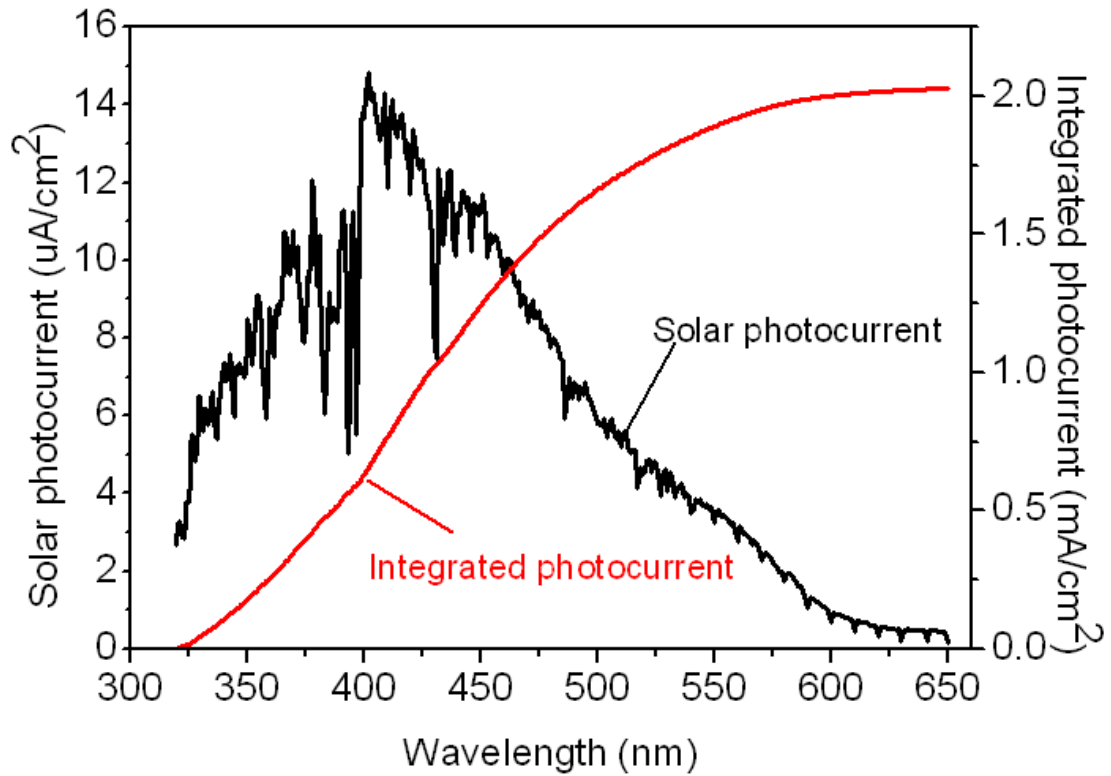

**Figure S4:** The integrated photocurrent of H<sub>2</sub>-treated (8 mmol NaBH<sub>4</sub>) hematite based on the IPCE data (320 nm to 650nm) at 1.23 V vs. RHE. The photocurrent density was calculated by integrating the IPCE spectra with a standard AM 1.5G solar spectrum (ASTMG-173-03), using the following equation (Ref: Nano Lett., 2011, 11, 3503):

$$I = \int_{320}^{650} \frac{1}{1240} \lambda \text{IPCE}(\lambda) E(\lambda) d(\lambda)$$

where  $E(\lambda)$  is the solar spectral irradiance at a specific wavelength ( $\lambda$ ) and  $\text{IPCE}(\lambda)$  is the obtained IPCE profile as a function of wavelengths ( $\lambda$ ) at 1.23 V vs. RHE. The calculated photocurrents are 2.03 mA cm<sup>-2</sup> at 1.23 V vs. RHE.

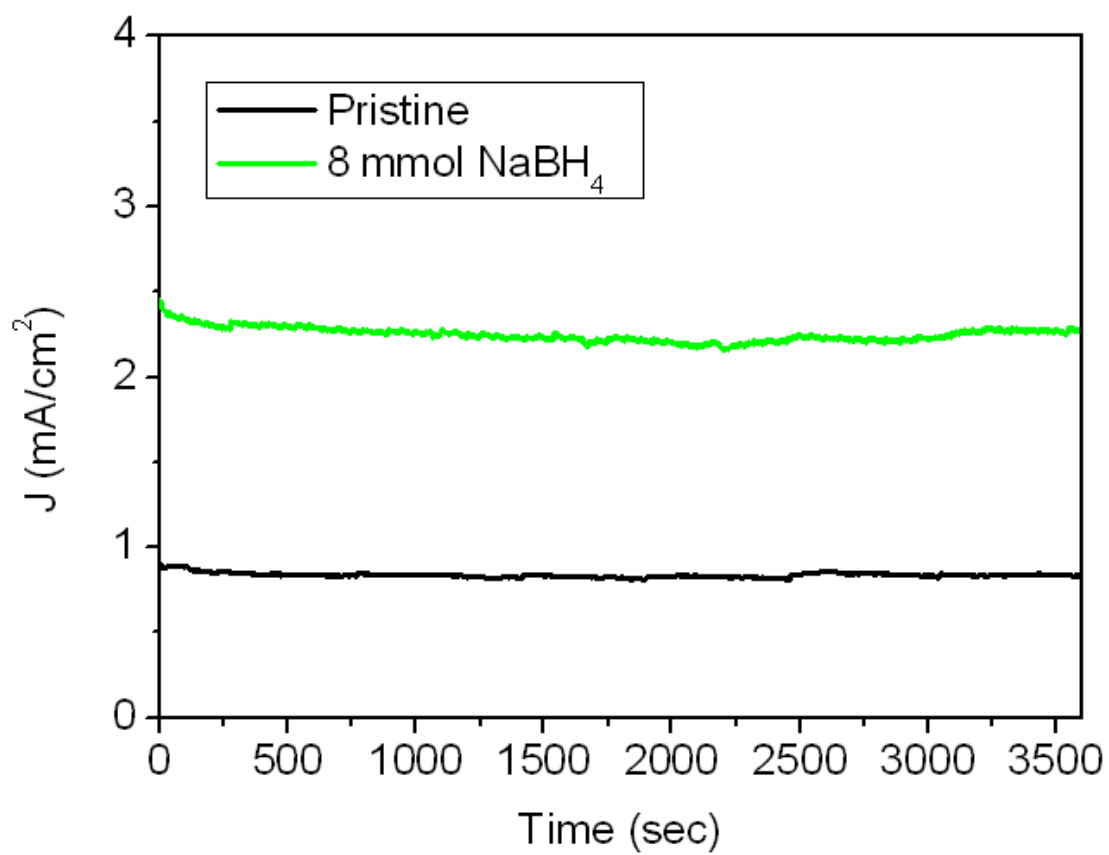

**Figure S5:** Photochemical stability curves for pristine and  $\text{H}_2$ -treated (8 mmol  $\text{NaBH}_4$ ) hematite electrodes collected at 1.23 V vs. RHE.

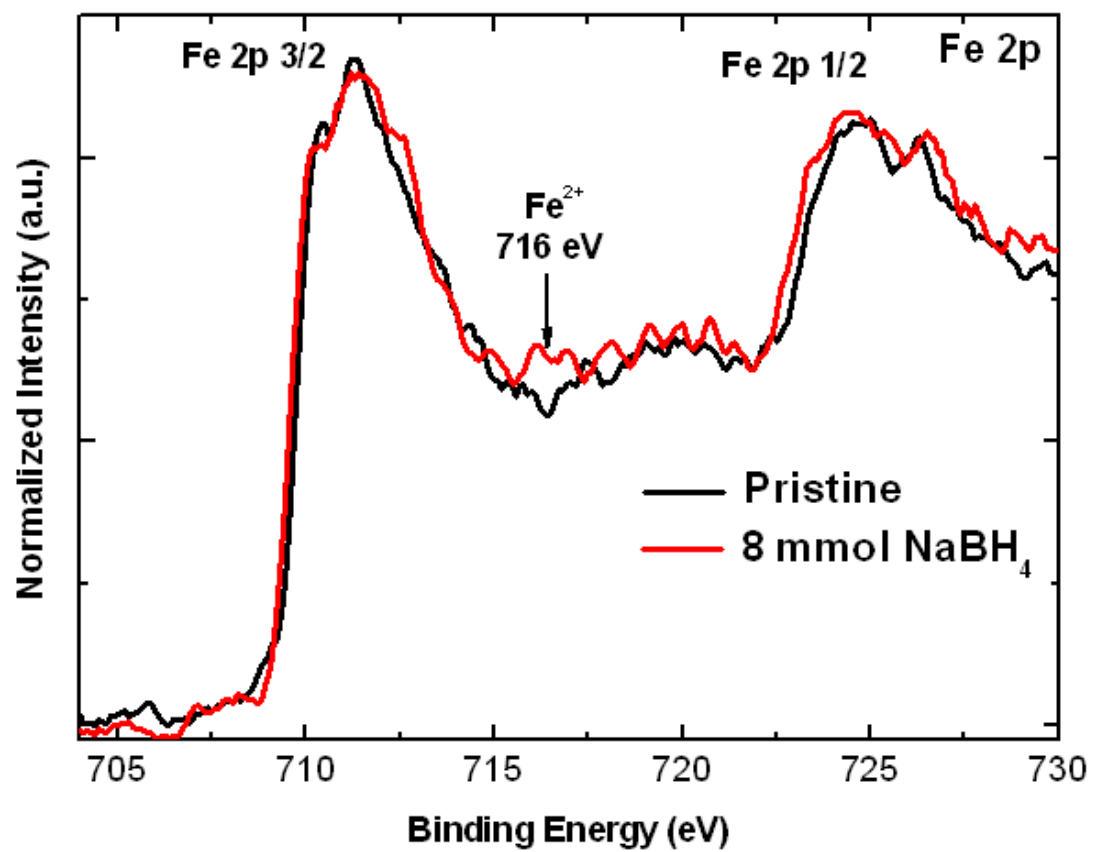

**Figure S6:** Fe 2p XPS spectra of pristine and H<sub>2</sub>-treated (8 mmol NaBH<sub>4</sub>) hematite nanostructures.
